1  
2  
3  
4  
5  
6  
7  
8  
9  
10  
11  
12  
13  
14  
15  
16  
17  
18  
19  
20  
21

**The Draft Genome of *Kochia scoparia* and the Mechanism of Glyphosate Resistance via Transposon-Mediated *EPSPS* Tandem Gene Duplication**

Eric L. Patterson<sup>1,2</sup>, Christopher A. Sasaki<sup>2</sup>, Daniel B. Sloan<sup>3</sup>, Patrick J. Tranel<sup>4</sup>, Philip Westra<sup>1</sup>,  
Todd A. Gaines<sup>1,\*</sup>

<sup>1</sup> Department of Bioagricultural Sciences and Pest Management, Colorado State University, Fort Collins, CO 80523, USA.

<sup>2</sup> Department of Genetics and Biochemistry, Clemson University, Clemson, SC 29634.

<sup>3</sup> Department of Biology, Colorado State University, Fort Collins, CO 80523, USA.

<sup>4</sup> Department of Crop Sciences, University of Illinois, Urbana, IL 61801, USA.

\*Corresponding author: Todd Gaines, Department of Bioagricultural Sciences and Pest Management, Colorado State University, Fort Collins, CO 80523, USA, 970-491-6824, [todd.gaines@colostate.edu](mailto:todd.gaines@colostate.edu)

**Data deposition:** All raw sequence read files for the whole genome sequencing have been deposited in the Sequence Read Archive database at NCBI under BioProject ID PRJNA526487 (SRR8835960- SRR8835963). The genome assembly was submitted to the NCBI genomes database with the accession SNQN000000000.

22 **ABSTRACT**

23 Increased copy number of the 5-enolpyruvylshikimate-3-phosphate synthase (*EPSPS*) gene  
24 confers resistance to glyphosate, the world's most-used herbicide. There are typically three to  
25 eight *EPSPS* copies arranged in tandem in glyphosate-resistant populations of the weed kochia  
26 (*Kochia scoparia*). Here, we report a draft genome assembly from a glyphosate-susceptible  
27 kochia individual. Additionally, we assembled the *EPSPS* locus from a glyphosate-resistant  
28 kochia plant by sequencing a kochia bacterial artificial chromosome library. These resources  
29 helped reconstruct the history of duplication in the structurally complex *EPSPS* locus and  
30 uncover the genes that are co-duplicated with *EPSPS*, several of which have a corresponding  
31 change in transcription. The comparison between the susceptible and resistant assemblies  
32 revealed two dominant repeat types. We discovered a FHY3/FAR1-like mobile genetic element  
33 that is associated with the duplicated *EPSPS* gene copies in the resistant line. We present a  
34 hypothetical model based on unequal crossing over that implicates this mobile element as  
35 responsible for the origin of the *EPSPS* gene duplication event and the evolution of herbicide  
36 resistance in this system. These findings add to our understanding of stress resistance evolution  
37 and provide an example of rapid resistance evolution to high levels of environmental stress.

38 **Keywords:** genomics, weed biology, molecular evolution, herbicide resistance, mobile genetic  
39 element, gene duplication.

## 40 INTRODUCTION

41 Gene copy number variation is an important source of genetic variation that can be  
42 deleterious in some cases, such as causing cancer in humans, and that can also increase genetic  
43 variation and lead to adaptations (Schimke et al. 1985; Lynch and Conery 2000; DeBolt 2010; Xi  
44 et al. 2011; Hull et al. 2017). This is especially true in plants where novel genetic variation is  
45 essential in the face of rapidly changing environments (DeBolt 2010). Increases in copy number  
46 of the 5-enolpyruvylshikimate-3-phosphate synthase (*EPSPS*) gene can confer resistance to  
47 glyphosate, the world's most-used herbicide, in several plant species (reviewed in Sammons and  
48 Gaines 2014). These increases result in the over-production of the EPSPS protein, glyphosate's  
49 target (Gaines et al. 2010; Wiersma et al. 2015), making it necessary for the application of more  
50 glyphosate to have the same lethal effect (Vila-Aiub et al. 2014; Godar et al. 2015; Gaines et al.  
51 2016; Koo et al. 2018). This phenomenon has been observed in eight weed species to date;  
52 however, the DNA sequence surrounding the *EPSPS* gene duplication has only been resolved in  
53 one species, *Amaranthus palmeri* (Molin et al. 2017; Patterson et al. 2018), as most weed species  
54 do not have sequenced genomes. In the case of *A. palmeri*, *EPSPS* gene duplication is caused by  
55 a large, circular, extra-chromosomal DNA element that replicates autonomously from the nuclear  
56 genome (Molin et al. 2017; Koo et al. 2018). This mechanism results in *A. palmeri* plants  
57 containing up to hundreds of *EPSPS* copies (Gaines et al. 2010).

58 Recently, *EPSPS* gene duplication has been described in the weed species *Kochia*  
59 *scoparia* (kochia, syn. *Bassia scoparia*), one of the most important weeds in the Central Great  
60 Plains of the United States and Canada (Beckie et al. 2013; Jugulam et al. 2014; Beckie et al.  
61 2015; Kumar et al. 2015; Wiersma et al. 2015; Gaines et al. 2016; Martin et al. 2017; Beckie et  
62 al. 2018). In glyphosate-resistant kochia, *EPSPS* copy numbers typically range from 3 to 8 with

63 the highest reports at 11 copies (Gaines et al. 2016). In contrast to the extrachromosomal element  
64 observed in *A. palmeri*, fluorescence *in situ* hybridization (FISH) has shown that the *EPSPS*  
65 copies in kochia are arranged in tandem at a single chromosomal locus and are most likely  
66 generated by unequal crossing over (Jugulam et al. 2014). More detailed cytogenetics studies  
67 using fiber-FISH estimated that most repeats of the *EPSPS* loci are either 45 kb or 66 kb in  
68 length. Both inverted repeats and repeats of 70 kb in length were also observed (Jugulam et al.  
69 2014). The initial event that started *EPSPS* gene duplication, the fine-scale sequence variation  
70 between the various types of repeats, and the other genes that may be co-duplicated with *EPSPS*  
71 remain unresolved.

72         Understanding how gene copy number variants form and their potential phenotypic  
73 consequences is essential for determining how plants adapt to their environment and thrive in  
74 adverse conditions. In this paper, we sequenced and assembled the genome of a glyphosate-  
75 susceptible kochia plant. We then identified the contig containing the *EPSPS* locus and  
76 investigated the genes that are co-duplicated with *EPSPS*, their transcription in glyphosate  
77 resistant and susceptible plants, and through whole-genome resequencing of a glyphosate-  
78 resistant plant, discovered the upstream and downstream borders of the duplicated region. We  
79 next sequenced and assembled the *EPSPS* locus from a glyphosate-resistant kochia plant using  
80 bacterial artificial chromosomes (BACs) probed for 1) the *EPSPS* gene, 2) the downstream  
81 junction, and 3) the upstream junction. After assembling four BACs we generated a model  
82 sequence of the *EPSPS* duplicated locus containing six instances of the *EPSPS* gene. We  
83 discovered two dominant repeat types with occasional inversions and repeats of different sizes  
84 using a combination of qPCR markers, genomic resequencing, and RNA-Seq data. Through this  
85 analysis, we also discovered a 16 kb mobile genetic element (MGE) that is associated with the

86 gene duplication event. This MGE contains four putative coding sequences. We hypothesize that  
87 the insertion of this MGE downstream of the *EPSPS* gene is responsible for a disruption of this  
88 region and the origin of the *EPSPS* gene duplication event.

89

## 90 **MATERIAL AND METHODS**

### 91 *Tissue Collection and Nucleic Acid Extraction*

92 The herbicide-susceptible *K. scoparia* line “7710” (Preston et al. 2009; Pettinga et al.  
93 2018) was used for genomic sequencing. All plants in this line were consistently controlled by  
94 glyphosate treatments at field rates of 860 g a.e. ha<sup>-1</sup>. Plants were grown in a greenhouse at  
95 Colorado State University. After seeds germinated, they were transferred into 4 L pots filled with  
96 Fafard 4P Mix supplemented with Osmocote fertilizer (Scotts Co. LLC), regularly watered, and  
97 grown under a 16-hr photoperiod. Temperatures in the greenhouse cycled between 25 °C day and  
98 20 °C nights. A single, healthy individual was selected for tissue collection.

99 A glyphosate resistant line (M32) was obtained from a field population near Akron,  
100 Colorado (40.162382, -103.172849) in the autumn of 2012. After glyphosate failed to control  
101 these plants in the field, seed was collected from ten surviving individuals. Seeds were  
102 germinated and treated with 860 g a.e. ha<sup>-1</sup> of glyphosate and ammonium sulfate (2% w/v).  
103 Survivors were then collected, crossed and seed was collected. This process was repeated for  
104 three generations until no susceptible individuals were observed in the progeny. All plants were  
105 confirmed to have elevated *EPSPS* copy number using genomic qPCR (Gaines et al. 2016).

106 For shotgun genome Illumina sequencing of the two lines, DNA was extracted from  
107 samples using a modified CTAB extraction protocol (see Supporting Information). For large-  
108 fragment, genomic PacBio sequencing of the glyphosate-susceptible line, the CTAB protocol

109 was further modified to obtain more DNA of sufficiently large size (>10kb) (see Supporting  
110 Information). For RNA-Seq, susceptible and resistant plants were grown in the greenhouse as  
111 described above, until they were ~10 cm tall and 100 mg of young expanding leaf tissue was  
112 taken from each plant. RNA was extracted from young leaf tissue from four plants from each of  
113 the glyphosate-susceptible and resistant lines using the Qiagen RNeasy Plus Mini Kit. Each  
114 replicate sample was normalized to a total mass of 200 ng total RNA.

### 115 *Sequencing Libraries*

116 Three genomic DNA libraries of glyphosate-susceptible kochia DNA were prepared for  
117 Illumina sequencing on a HiSeq 2500 at the University of Illinois, Roy J. Carver Biotechnology  
118 Center for genome assembly. First, DNA was size selected to 240 bp so that there was overlap  
119 between the read pairs in a high-coverage, short-insert library sequenced on one full flow cell (8  
120 lanes) for use with ALLPATHS-LG. Second, two large insert, mate-pair libraries (5 kb and 10  
121 kb) were each run on 1 lane at 2×150 bp.

122 Additionally, genomic DNA from the glyphosate resistant line was prepared for Illumina  
123 sequencing using the Genomic DNA Sample Prep Kit from Illumina following the  
124 manufacturer's protocols and sequenced on one entire lane of a HiSeq 2500 flow cell. Quality of  
125 the raw Illumina sequence reads was assessed using FASTQC v0.10.1. Adapters were removed  
126 using Trimmomatic version 0.60 with the parameters "ILLUMINACLIP:  
127 tranel\_adaptors.fa:2:30:10 TRAILING:30 LEADING:30 MINLEN:45" using these adapters:  
128 "AGATCGGAAGAGCAC" and "AGATCGGAAGAGCGT".

129 A large insert DNA library for PacBio sequencing was generated at the UC Davis  
130 Genome Center using the PacBio SMRT Library Prep for RSII followed by BluePippin size  
131 selection for fragments >10 kb. The library was sequenced with 12 PacBio SMRT cells using the

132 RSII chemistry after a titration cell to determine optimal loading. In total, 2,760,348 PacBio  
133 reads were generated with a read N50 of 6,576 bp with the largest read being 41,738 bp.

134 Strand-specific RNA-Seq libraries were prepared robotically on a Hamilton Star  
135 Microlab at the Clemson University Genomics and Computational Facility following in-house  
136 automation procedures generally based on the TruSeq Stranded mRNAseq preparation guide.  
137 The prepared libraries were pooled and 100 bp paired-end reads were generated using a NextSeq  
138 500/550.

### 139 *Susceptible Genome Assembly*

140 Two different assemblies were generated that integrated the PacBio and Illumina data of  
141 the susceptible kochia line. These two assemblies were then compared and merged by consensus  
142 for a single final assembly referred to as KoSco-1.0. For the first assembly, raw PacBio reads  
143 were error corrected using the high coverage, paired-end Illumina library with the error  
144 correcting software Proovread 2.13.11 (Hackl et al. 2014). Proovread was run with standard  
145 parameters, using the high coverage 150 bp, paired-end Illumina library on each SMRT cell  
146 individually. Error corrected reads were then assembled using the Celera Assembler fork for long  
147 reads, Canu 1.0 (Koren et al. 2017). Canu was run with a predicted genome size of 1 Gb, and the  
148 PacBio-corrected settings. For the second assembly, an initial ALLPATHS-LG v r52488  
149 assembly was made with all three Illumina libraries (Butler et al. 2008). ALLPATHS was run  
150 assuming a haploid genome of 1 Gb. The resulting contigs were then scaffolded using the  
151 uncorrected PacBio reads and the software PBJelly 15.8.24 (English et al. 2012). PBJelly was  
152 run with the following blasr settings: “minMatch 8 -sdpTupleSize 8 -minPctIdentity 75 -bestn 1  
153 -nCandidates 10 -maxScore -500 -nproc 19 -noSplitSubreads”. The two assemblies were then  
154 merged with GARM Meta assembler 0.7.3 to get a final version of the genome assembly for our

155 analysis (Mayela Soto-Jimenez et al. 2014). The assembly from ALLPATHS was set to  
156 assembly “A” and the assembly from Canu was set as genome “B.” All other parameters were  
157 kept standard. We refer to the resulting meta-assembly as KoSco-1.0

### 158 *Genome Annotation*

159 The merged assembly was annotated with the WQ-Maker 2.31.8 pipeline in conjunction  
160 with CyVerse (Cantarel et al. 2008; Thrasher et al. 2014). WQ-Maker was informed with kochia  
161 transcriptome from Wiersma et al. (2015), all expressed sequence tags (ESTs) from the  
162 Chenopodiaceae downloaded from NCBI, all protein sequence from the Chenopodiaceae family  
163 downloaded from NCBI, and Augustus using *Arabidopsis thaliana* gene models. The resulting  
164 predictions were then used to train SNAP (2013-02-16) through two rounds for final gene model  
165 predictions. Gene space completeness was assessed using BUSCO v3 and the eudicotyledons  
166 *odb10* pre-release dataset using standard parameters (Simão et al. 2015).

167 The predicted gene transcripts (mRNA) and predicted translated protein sequence were  
168 then annotated using Basic Local Alignment Search Tool Nucleotide (BLASTN) and Protein  
169 (BLASTP) 2.2.18+ for similarity to known transcripts and proteins, respectively. Alignments  
170 were made to the entire NCBI nucleotide and protein databases. For all BLAST homology  
171 searches, the e-value was set at 1e-25 and only the best match was considered. The predicted  
172 proteins were further annotated using InterProScan 5.28-67.0 for protein domain predictions (Mi  
173 et al. 2005; Camacho et al. 2009; Jones et al. 2014). InterProScan was run using standard  
174 settings. The complete assembly was analyzed using RepeatMasker 4.0.6 to search for small  
175 interspersed repeats, DNA transposon elements, and other known repetitive elements using the  
176 “Viridiplantae” repeat database and standard search parameters (Tarailo-Graovac and Chen  
177 2009).



178 *Genomic Resequencing of Glyphosate Resistant Kochia and Differential Gene Expression*

179 Genomic resequencing reads from the glyphosate resistant plant were aligned to the  
180 KoSco-1.0 genome assembly using the BWA-backtrack alignment program with default  
181 parameters (Li and Durbin 2009). The boundaries of the *EPSPS* copy number variant were  
182 manually detected where coverage dramatically increased up- and down-stream of the *EPSPS*  
183 gene.

184 RNA-Seq reads from susceptible and resistant plants were aligned to the gene models  
185 from the genome assembly using the mem algorithm from the BWA alignment program version  
186 0.7.15 under standard parameters. Read counts for each gene were extracted from this alignment  
187 using the software featureCounts in the Subread 1.6.0 package and the gene annotation generated  
188 by WQ-Maker (Liao et al. 2013). Expression level and differential expression between the  
189 glyphosate susceptible and glyphosate resistant plants for all genes were calculated with the  
190 EdgeR package using the quasi-likelihood approach in the generalized linear model (glm)  
191 framework as described in the user manual (Robinson et al. 2010).

192 *Assembling the EPSPS Locus from a Glyphosate Resistant Plant*

193 A library of bacteria artificial chromosomes (BACs) was generated from a single  
194 glyphosate resistant kochia plant selected from the glyphosate resistant population following the  
195 protocol described in Luo and Wing (2003) with modifications as described in Molin et al.  
196 (2017). High molecular weight (HMW) DNA was extracted from young leaf tissue from a single  
197 glyphosate resistant plant using a modified CTAB DNA extraction protocol. This HMW DNA  
198 was ligated to a linearized vector and transformed into *E. coli* using electroporation.  
199 Recombinant colonies were then grown on LB plates. Radiolabeled probes were designed for the  
200 *EPSPS* gene itself, a sequence upstream, and a sequence downstream of the *EPSPS* CNV.

201 Predicted locations for the probes were determined by looking at the alignment of shotgun  
202 Illumina data from the glyphosate resistant line against the contig containing *EPSPS* in the  
203 genome assembly. Several colonies containing the appropriate sequences were identified for  
204 each probe. These identified BACs were end sequenced to determine their approximate location  
205 and run on pulse-field gel electrophoresis to determine their approximate size. Colonies  
206 containing positive BACs of the correct position and size were isolated and cultured. HMW  
207 DNA was extracted from these colonies and prepared using a SMRTbell Template Prep Kit, 1.0  
208 using the manufacturer-recommended protocols. Finally, the HMW DNA was sent for RSII  
209 PacBio sequencing on two SMRT cells performed at The University of Delaware, DNA  
210 Sequencing & Genotyping Center.

211 PacBio reads were assembled using the software Canu (Koren et al. 2017). The BAC  
212 vector sequence was then removed from the assembled contigs. Using the known size of the  
213 BACs, their end-sequences and the corresponding contig from the susceptible genome assembly,  
214 entire BAC sequences were reconstructed manually from the contigs produced by CANU. These  
215 “full-length” BACs were then aligned, and overlaps were used to generate the largest contiguous  
216 length possible. This BAC meta-assembly was aligned to the susceptible contig from the genome  
217 assembly containing the *EPSPS* gene using YASS. Additionally, the BAC insert sequences were  
218 run through the MAKER pipeline, informed with cDNA and protein annotations from the  
219 Chenopodiaceae and the gene models from the kochia genome (Cantarel et al. 2008) for gene  
220 annotation. This BAC assembly led to the discovery of two dominant repeat types (a full length  
221 56.1 kb repeat and a smaller 32.9 kb repeat), the upstream and downstream boundaries of the  
222 CNV, as well as a large mobile genetic element that was interspersed in the repeat structure.

223 Using the Illumina genomic resequencing data from the resistant line, we calculated the  
224 copy number of four regions from the CNV by read depth as follows: 1) the region directly  
225 upstream of the CNV; 2) the region directly downstream of the CNV; 3) the mobile genetic  
226 element; and 4) the full length, 56.1 kb repeat. This 56.1 kb repeat was then subdivided into the  
227 region only present within the 56.1 kb repeat and the region that is shared between the 56.1 kb  
228 repeat and a smaller 32.9 kb repeat. Highly repetitive regions and those containing transposable  
229 elements were masked for the alignment of resequencing reads. Genomic resequencing reads  
230 from the glyphosate resistant plant were aligned to these units using the BWA-backtrack  
231 alignment program using standard parameters. The number of reads mapping to each unit was  
232 calculated and divided by the length of that region to get the average number of reads per  
233 unmasked DNA length. The upstream and downstream read depths were averaged and used to  
234 standardize the read depths of each of the four units. These standardized read depths correspond  
235 with the predicted copy number of each unit.

### 236 *Markers for Confirming the Structure of the EPSPS CNV*

237 Primers were designed that were spaced at regular intervals (~5 kb-15 kb) along the  
238 susceptible contig that spanned the putative CNV area for genomic qPCR analysis (Table 2).  
239 Additionally, qPCR primers were designed that spanned the junctions of the two dominant repeat  
240 types, the upstream and downstream boundaries of the CNV, as well as for the mobile genetic  
241 element (Table 2). Primers were designed to closely mimic the primers already published for the  
242 *EPSPS* gene (Wiersma et al. 2015), including a melting temperature between 51 and 56 °C, a GC  
243 content between 40 and 50%, and a length of between 20 and 24 bp. Furthermore, the resulting  
244 amplicon had to be between 100 and 200 bp long. All genomic PCR was performed using the  
245 same protocol established for *EPSPS* copy number assay (Gaines et al. 2016).

246 For genomic PCR screening of kochia populations for these repeat features, both  
247 susceptible and resistant plants were grown in the greenhouse until they were ~10 cm tall and  
248 100 mg of young expanding leaf tissue was taken from each plant. DNA was extracted from this  
249 tissue using the recommended protocol from the DNeasy Plant Mini Kit. The DNA quality and  
250 concentration were checked using a NanoDrop 1000 and diluted to 5 ng/μl. For qPCR two genes  
251 were used as single-copy controls: acetolactate synthase (*ALS*) and copalyl di-phosphate  
252 synthetase 1 (*CPS*). Each qPCR reaction consisted of 12.5 μL PerfeCTa SYBR<sup>®</sup> green Super  
253 Mix (Quanta Biosciences), 1 μL of the forward and reverse primers at 10 μM, 10 ng gDNA (2  
254 μL), and 9.5 μL of sterile water for a total volume of 25 μL.

255 A BioRad CFX Connect Real-Time System was used for qPCR. The temperature cycle  
256 for all reactions was as follows: an initial 3 min at 95 °C followed by 35 rounds of 95 °C for 30  
257 sec and 53 °C for 30 secs with a fluorescence reading at 497 nm after each round. A melt curve  
258 was performed from 65–95 °C in 0.5 °C increments for each reaction to verify the production of  
259 a single PCR product. Additionally, all products from a susceptible line were run on a 1.5%  
260 agarose gel to verify a single product with low to no primer dimerization. Relative quantification  
261 was calculated using the comparative C<sub>t</sub> method:  $2^{\Delta C_t} (\Delta C_t = (C_t^{(ALS)} + C_t^{(CPS)})/2 - C_t^{EPSPS})$   
262 (Schmittgen and Livak 2008).

### 263 *Data Access*

264 All raw sequence read files for the whole genome sequencing have been deposited in the  
265 Sequence Read Archive database at NCBI under BioProject ID PRJNA526487 (SRR8835960-  
266 SRR8835963). The genome assembly was submitted to the NCBI genomes database with the  
267 accession SNQN000000000.

268

## 269 **RESULTS**

### 270 *Genome Assembly and Annotation*

271           The KoSco-1.0 assembly consisted of 19,671 scaffolds, spanning 711 Mb. The longest  
272 scaffold was 770 kb and the N50 was 62 kb for this assembly. Approximately 9.43% of the base  
273 pairs were unknown “N” bases that serve only as scaffolding and distance information (Sup.  
274 Table 1). After annotation with Maker, 47,414 genes were predicted in KoSco-1.0 with an  
275 average transcript length of 943 bp (Sup. Table 2), compared to the 27,429 genes in *Beta*  
276 *vulgaris* (Dohm et al. 2014). KoSco-1.0 was analyzed using BUSCO for completeness, which  
277 found 1,490 out of 2,121 (70.3%) ultra-conserved genes from the eudicotyledons *odb10* dataset  
278 (Sup. Table 3). Approximately 62% of predicted kochia genes found one or more matches in the  
279 NCBI database(s) using a BLAST e-value < 1e-25 and almost 82% of predicted proteins were  
280 assigned one or more functional InterPro domain(s) (Sup. Table 2). RepeatMasker uncovered  
281 6.25% of the genome assembly consisting of interspersed repeats with the largest proportion  
282 consisting of LTR elements of either the Ty1/Copia or Gypsy/DIRS1 variety. Simple repeats  
283 made up approximately 2.5% of the assembly (Sup. Table 4).

### 284 *The EPSPS Locus and Differential Gene Expression*

285           The contig containing the *EPSPS* locus from the susceptible genome assembly was  
286 399,779 bp long. The *EPSPS* gene model was 5,551 bp long (UTRs, exons, and introns included)  
287 and located between base pairs 91,663-97,214 of the contig. When this contig was aligned to  
288 *Beta vulgaris* near perfect synteny was observed; however, when compared to the sequence  
289 responsible for duplicating *EPSPS* from *Amaranthus palmeri*, little similarity existed outside of  
290 the *EPSPS* gene itself (Figure 1).

291           When shotgun Illumina genomic reads from the glyphosate resistant line were aligned to  
292 the contig, the read depth of *EPSPS* and its surrounding area was much greater (> 7.26-fold) than  
293 the background read depth. Using this alignment, it was possible to predict the exact boundaries  
294 of the *EPSPS* CNV starting at base pair 41,684 and continuing to base pair 101,128. This region  
295 contains seven coding genes of various functions including *EPSPS* itself (Table 1). When  
296 differential expression of all genes in the genome was calculated using RNA-Seq data, five of the  
297 genes in this region showed over expression in the glyphosate resistant line, one gene showed  
298 under-expression in the glyphosate resistant line, and one showed no significant difference (FDR  
299 adjusted p-value < 0.05) (Table 1). Since gene expression is dynamic, depending on both  
300 environmental conditions and developmental stage, the genes not showing DE may be  
301 overexpressed in glyphosate resistant plants under different experimental conditions. When the  
302 *EPSPS* contig was aligned to itself, there was no evidence for sequence complexity (simple  
303 sequence repeats, inverted repeats, self-homology, etc.) at the predicted boundaries of the CNV  
304 (Sup. Figure 2).

### 305 *The EPSPS Locus from a Glyphosate Resistant Plant*

306           Using PacBio data of four BACs from a glyphosate resistant plant, we assembled four  
307 contigs that were 129.0 kb for the BAC detected with the upstream probe, 134.2 kb for the BAC  
308 detected with the downstream probe, and 140.5 kb and 78.0 kb for two BACs detected with the  
309 *EPSPS* probe. These assemblies encompassed at least six repeats of the *EPSPS* gene and a  
310 significant portion of the upstream and downstream sequence. The largest and most complete  
311 repeat was 56.1 kb long and contained the entire region predicted from the alignment of resistant  
312 Illumina data against the susceptible *EPSPS* contig, including all seven of the predicted genes in  
313 this region. The second type was 32.7 kb and contained only four of the seven co-duplicated

314 genes from the 56.1 kb repeat, including *EPSPS* and the three genes immediately upstream of it.  
315 The third repeat was a full-length inversion of the 56.1 kb repeat. The fourth type of repeat was  
316 an 18.2 kb inverted repeat that contained only *EPSPS* and a fraction of one upstream gene. The  
317 fifth and final repeat structure was identified as a forward repeat of 33.1 kb, containing *EPSPS*  
318 and the three genes immediately upstream of it (Figure 2). All repeats end at the same  
319 downstream base pair, directly after *EPSPS*; however, the beginning upstream base pair of each  
320 repeat type is variable (Figures 2 and 3).

321       Enough overlap existed among the BAC contigs to composite all BAC assemblies  
322 together to make a representative sequence (meta-assembly) that contained two full-length 56.1  
323 kb repeats and one of each of the other repeat types. Additionally, the flanking single-copy  
324 upstream and downstream sequences were included. When this BAC meta-assembly from  
325 glyphosate resistant kochia was aligned to the susceptible contig from the genome assembly, we  
326 observed perfect agreement between the resistant and susceptible loci; however, a large disparity  
327 was evident at each repeat junction and on either end of the resistant repeat structure (Figures 3).  
328 A 16,037 bp sequence was inserted just downstream and upstream of all repeats in the  
329 glyphosate resistant BAC assemblies. This insert shows no homology with any part of the  
330 susceptible contig; furthermore, when this insertion was aligned against the entire susceptible  
331 genome, this region was not found in its entirety.

332       Maker was run on this insertion to predict gene models and identified four regions with  
333 putative coding genes. The first predicted gene belonged to the family of genes known as  
334 FHY3/FAR1 (IPR031052) and contained the domains: “AR1 DNA binding” and “zinc finger,  
335 SWIM-type” (IPR004330F, IPR007527 respectively). The second gene’s function was less clear  
336 but was identified to be part of the Ubiquitin-like domain superfamily (IPR029071). The third

337 gene's function was also unclear and was generally identified as belonging to the  
338 Endonuclease/exonuclease/phosphatase superfamily (IPR036691). The fourth and final gene had  
339 no identifiable InterPro domains, and had BLAST hits to uncharacterized proteins in NCBI. We  
340 refer to this insertion as the mobile genetic element (MGE) in all figures and discussion as it  
341 seems to have inserted only in resistant lines from an unknown *trans* location in the genome.

#### 342 *Markers for Confirming the Structure of the EPSPS CNV*

343 Quantitative PCR markers were developed dispersed across the entire CNV, including  
344 markers on both sides in regions that show no evidence of CNV (Table 3). These markers  
345 performed, for the most part, as predicted based on the resequencing of the glyphosate resistant  
346 plants and the BAC sequencing. All markers upstream and downstream of the CNV are  
347 approximately single copy. Markers 3 and 4, predicted to be only in the longer, 56.1 kb repeat,  
348 both show increased copy number in resistant individuals. Markers 5, 6, 7, and 8, are in both  
349 56.1 kb and 32.7 kb repeats. These four markers were tightly associated, co-varied for each  
350 individual, and showed higher copy number than markers 3 and 4 (Table 3).

351 Additional qPCR markers were developed that only amplified when the MGE was  
352 flanked by either the two dominant repeat types of 56.1 kb or 32.7 kb. Using these markers, we  
353 quantified the number of 56.1 kb or 32.7 kb repeats in several individuals. In our line, 32.7 kb  
354 repeats were less frequent than 56.1 kb repeats. The tested individuals each had approximately  
355 two 32.7 kb repeats and between five and seven 56.1 kb repeats (Table 4). These markers did not  
356 amplify in any susceptible plants, which supports the discovery that the MGE is not present at  
357 the beginning of the susceptible *EPSPS* locus.

358 Additionally, we developed a marker internal to the MGE. All susceptible individuals had  
359 approximately 4-5 copies of this marker; however, none of these regions were present in the



360 KoSco-1.0 genome assembly. In resistant individuals, we detected 14-18 copies of the MGE. If  
361 we account for the 4-5 copies that are in the susceptible individuals and if we consider that a  
362 MGE exists at both the upstream and downstream boundary, then we would predict 9-13 copies,  
363 which almost perfectly correlates with the copy number observed for qPCR markers 5, 6, 7, and  
364 8. This would indicate that one copy of the MGE is associated with each repeat (Table 4).

365 Illumina shotgun genome resequencing data from a resistant kochia plant aligned to four  
366 distinct units from the BAC assembly was used to calculate the copy number of each unit of the  
367 repeat structure and to confirm our qPCR results. After standardizing the read depth of each unit  
368 by the background read depth, we calculated 7.4 copies of the 56.1 kb repeat, 10.9 copies of the  
369 32.7 kb repeat type, and 14.3 copies of the mobile genetic element (Figure 4A, 4B). It should be  
370 noted that the unit of the 32.7 kb repeat type includes reads from all repeats due to the sequence  
371 of this region being shared in all repeat types. With this information in conjunction with  
372 previously published cytogenetic work (Jugulam et al. 2014; Jugulam and Gill 2018), we  
373 propose a model for the structure of the *EPSPS* CNV from resistant kochia individuals (Figure  
374 5).

## 376 **DISCUSSION**

### 377 *Structure and Genetic Content of the EPSPS Tandem Duplication Region*

378 The *EPSPS* contig from susceptible kochia has near perfect synteny with *Beta vulgaris*  
379 along its entire length but little homology with the *EPSPS* region from *Amaranthus palmeri*  
380 (Figure 1). Thus, multiple species within the Caryophyllales have independently evolved  
381 glyphosate resistance via *EPSPS* gene duplication but have done so through very different

382 genomic mechanisms: tandem duplication vs. proliferation of an extrachromosomal element  
383 (Jugulam et al. 2014; Molin et al. 2017; Koo et al. 2018; Patterson et al. 2018).

384 We discovered the genomic elements that constitute the two most dominant repeats in the  
385 tandem duplication. Additionally, we discovered a MGE in between each repeat. Taking  
386 everything into account, there is most often either 72.6 kb or 49.2 kb between *EPSPS* genes in  
387 the CNV locus. These estimates are similar to but slightly larger than the previously fiber-FISH  
388 estimated sizes of 66 kb and 45 kb respectively in another resistant kochia line (Jugulam et al.  
389 2014). What accounts for the differences between our assemblies and the previously reported  
390 fiber-FISH studies remains unclear, as Fiber-FISH can have a resolution of ~1 kb (Ersfeld 1994).  
391 It may be that different populations of kochia have different repeat sizes. Further testing and  
392 validation on the type and size of the *EPSPS* repeats in various, divergent populations is needed  
393 to confirm this. We did detect an inverted repeat near the downstream end of the CNV as shown  
394 by Jugulam et al. (2014).

395 RNA-Seq expression data shows that four of the six genes within the conserved region of  
396 the tandem-repeat are over-expressed at a rate commensurate with genomic resequencing read  
397 depth: *RAD51*, *transketolase*, *tRNA N6-adenosine threonylcarbamoyltransferase*, and *EPSPS*  
398 (FDR adjusted p-value <0.05). The expression of two other genes (*golgin subfamily A member 6-*  
399 *like protein 6* and *NRT1/ PTR Family 7.2-like*) is reduced in the resistant line and may be due to  
400 gene silencing, similar to what happens when multiple copies of transgenes are inserted in the  
401 same plant (Finnegan and McElroy 1994; Tang et al. 2006) (Table 1). The obvious benefit of  
402 *EPSPS* over-expression is glyphosate resistance, but the phenotypic effects due to increased  
403 expression of other genes in this CNV remain unclear.

404 The expression of the *RAD51* homolog is especially interesting due to its importance in  
405 regulating crossing over. Mis-expression, up or down, of *RAD51* has been shown to cause cancer  
406 in animal tissues as *RAD51* is involved in regulating homologous recombination of DNA during  
407 double stranded break repair (Maacke et al. 2000) (Table 1). Additionally, RAD51, along with  
408 the recombinase DMC1, facilitate recombination of homologous chromosomes during meiosis in  
409 plants and animals (Crickard et al. 2018). In humans, *RAD51* expression is modulated by  
410 miRNAs and mis-regulation of these miRNAs are often associated with various forms of cancer  
411 (Choi et al. 2014; Gasparini et al. 2014; Cortez et al. 2015; Liu et al. 2015a; Liu et al. 2015b).  
412 Therefore, we would predict that over-expression of *RAD51* in the resistant line would have a  
413 large impact phenotypic consequence and could change the recombination rates and double  
414 strand break repair.

415 We used qPCR genomic copy number primers to validate much of our BAC assembly.  
416 The results from a pair of primers that detected the presence and number of the MGE were  
417 surprising. In the susceptible plant, approximately 4-6 MGE copies were observed despite not  
418 appearing in the susceptible genome assembly; therefore, this MGE is present in the susceptible  
419 plant but it was not assembled in the whole genome assembly. It may be that these background  
420 copies lie in repetitive or difficult to assemble regions. In the resistant plants, the number of  
421 MGE copies was always approximately equal to the *EPSPS* copy number plus 4-6 copies,  
422 indicating that the original copies found elsewhere in the genome are still present and the insert  
423 is being co-duplicated with every repeat of the *EPSPS* CNV. The fact that the MGE also seems  
424 to be in the susceptible lineage implies that the insertion in the *EPSPS* region originated by  
425 transposition within the genome.

426 *The Role of a Mobile Genetic Element in EPSPS Gene Duplication*

427           When the *EPSPS* contig from the susceptible genome assembly is aligned to itself, no  
428 complexities, such as SSRs or large homodimers of nucleotides, exist at the beginnings of any of  
429 the repeat types (Sup. Figure 1). This would indicate that the sequence in the susceptible locus  
430 alone is insufficient for explaining why this region has become a site for copy number variation,  
431 which is inconsistent with earlier predictions that homology exists at the upstream and  
432 downstream boundaries where an initial misalignment occurred (Jugulam et al. (2014). Mobile  
433 genetic elements, such as transposons, have been proposed to cause tandem repeats of sequences  
434 near their insertion point (Tsubota et al. 1989; Reams and Roth 2015).

435           We propose that the insertion of a MGE near the *EPSPS* locus in the resistant kochia line  
436 facilitated the subsequent history of tandem duplication in this region. The MGE contains a  
437 member of the Fhy3/FAR1 gene family. Genes in this family are thought to be derived from  
438 MULE transposons and have been “domesticated” to have a role in the regulation of genes  
439 involved in circadian rhythm and light sensing in a wide phylogentic distribution of angiosperms  
440 (Wang and Deng 2002; Hudson et al. 2003; Cowan et al. 2005; Tang et al. 2012). We  
441 hypothesize the insertion of the MGE near the *EPSPS* locus in resistant kochia line is evidence  
442 that Fhy3/FAR1 elements may still be mobile and that they are not fully “domesticated.”  
443 Because the insert appears to be both at the upstream and downstream borders of the CNV, we  
444 hypothesize that insertions of this MGE happened in two locations, flanking the *EPSPS* region.  
445 These two insertions then could have led to misalignment during meiosis as both MGEs are  
446 identical. A subsequent crossing-over event somewhere along the length of the misaligned MGE  
447 copies would have generated two alleles – one with two of the more common 56.1 kb repeats,  
448 and the other with no *EPSPS* gene, the latter of which would be lethal in the homozygous state.  
449 Such unequal crossing over could then facilitate further expansions of this region.

450 Interestingly, the MGE boundary shares 7-bp of sequence identity with the precise  
451 beginning of the shorter, less common 32.7 kb repeat. We propose that a recombination event  
452 took place between the MGE downstream boundary and the start site of the smaller 32.7 kb  
453 repeat, perhaps mediated by double-stranded break repair at the end of the MGE (Figure 5)  
454 (Ottaviani et al. 2014; Sfeir and Symington 2015). Short microhomology-mediated illegitimate  
455 recombination has been well studied in bacteria (Petes and Hill 1988; Nash 1996; Romero and  
456 Palacios 1997; de Vries and Wackernagel 2002; Reams and Neidle 2004). The presence of the  
457 MGE end at the breakpoint of the large inversion in the tandem array (Figure 2) further  
458 implicates double-stranded breaks at the MGE boundaries with the genome instability in this  
459 region. Homologous recombination and double strand break repair depend heavily on the  
460 enzyme RecA in bacteria and its homologue RAD51 in eukaryotes. These enzymes bind single-  
461 stranded DNA and promote strand invasion and therefore the exchange between homologous  
462 DNA molecules (Baumann and West 1998; Lin et al. 2006; Hastings et al. 2009). In kochia, it  
463 remains unclear if the presence of *RAD51* in the duplicated region is coincidental or has affected  
464 the evolution of this tandem duplication event.

#### 465 *EPSPS Duplication in Weeds*

466 Cytological evidence in kochia has previously shown that *EPSPS* gene duplication in  
467 kochia was due to tandem duplication and not by *trans*-duplication (Jugulam et al., 2014).  
468 However, this work was limited to cytology and was unable to pinpoint the sequence differences  
469 between resistant and susceptible plants. Additionally, the genetic content of the region outside  
470 of the *EPSPS* gene was unknown. Our work has resolved these uncertainties, providing a clearer  
471 understanding of the structure of the *EPSPS* gene duplication event and enabling investigation of  
472 the exact phenotypic and evolutionary consequences of this event.

473           Eight plant species have been confirmed to have evolved resistance to glyphosate via  
474 increased *EPSPS* gene copy number (reviewed in Patterson et al. 2018). Of these, only the  
475 genetic mechanisms of gene duplication in *Amaranthus palmeri* have been investigated and  
476 explained. In the case of *Amaranthus palmeri*, duplicated *EPSPS* genes are carried on a large  
477 extra-chromosomal circular DNA that is inherited by tethering to the chromatin (Molin et al.,  
478 2017, Koo et al., 2018). *Kochia* and *Amaranthus palmeri* are both members of the  
479 Caryophyllales; however, each species has independently evolved glyphosate resistance by  
480 *EPSPS* gene duplication from completely different genetic mechanisms.

#### 481 **CONCLUSION**

482           Widespread and repeated use of the herbicide glyphosate represents an intense abiotic  
483 selective pressure across large areas. Several weed species have evolved resistance to this  
484 pressure by means of increased copies of the target-site gene *EPSPS*. We identified a MGE at the  
485 duplicated *EPSPS* locus and hypothesize that the insertion of one or more of these MGEs  
486 initiated a tandem duplication event. Once the initial gene duplication occurred, the locus had  
487 unequal recombination producing gametes with increased and decreased copy numbers. This  
488 interplay between transposable elements and target site copy number variation provides valuable  
489 insight into how genomic plasticity may contribute to rapid evolution of abiotic stress tolerance.  
490 Continuing to investigate the roles transposable elements and gene duplication play in shaping  
491 plant resilience is essential for understanding evolution and how plant genomes are changing in  
492 response to human activities.

493

#### 494 **ACKNOWLEDGEMENTS**

495 This work was partially supported by the Colorado Wheat Administrative Committee, Dow  
496 AgroSciences, and by the USDA National Institute of Food and Agriculture, Hatch project  
497 COL00783, accession number 1016207, to the Colorado State University Agricultural  
498 Experiment Station.  
499

## REFERENCES

- 500  
501  
502 Baumann P, West SC. 1998. Role of the human RAD51 protein in homologous recombination  
503 and double-stranded-break repair. *Trends Biochem Sci.* 23:247-251.
- 504 Beckie HJ, Blackshaw RE, Low R, Hall LM, Sauder CA et al. 2013. Glyphosate- and  
505 acetolactate synthase inhibitor-resistant kochia (*Kochia scoparia*) in Western Canada.  
506 *Weed Sci.* 61:310-318.
- 507 Beckie HJ, Gulden RH, Shaikh N, Johnson EN, Willenborg CJ et al. 2015. Glyphosate-resistant  
508 kochia (*Kochia scoparia* L. Schrad.) in Saskatchewan and Manitoba. *Can J Plant Sci.*  
509 95:345-349.
- 510 Beckie HJ, Blackshaw RE, Leeson J, Stahlman PW, Gaines T et al. 2018. Seed bank persistence,  
511 germination and early growth of glyphosate-resistant *Kochia scoparia*. *Weed Res.*  
512 58:177-187.
- 513 Butler J, MacCallum I, Kleber M, Shlyakhter IA, Belmonte MK et al. 2008. ALLPATHS: de  
514 novo assembly of whole-genome shotgun microreads. *Genome Res.* 18:810-820.
- 515 Camacho C, Coulouris G, Avagyan V, Ma N, Papadopoulos J et al. 2009. BLAST+: architecture  
516 and applications. *BMC Bioinf.* 10:421.
- 517 Cantarel BL, Korf I, Robb SM, Parra G, Ross E et al. 2008. MAKER: an easy-to-use annotation  
518 pipeline designed for emerging model organism genomes. *Genome Res.* 18:188-196.
- 519 Choi YE, Pan Y, Park E, Konstantinopoulos P, De S et al. 2014. MicroRNAs down-regulate  
520 homologous recombination in the G1 phase of cycling cells to maintain genomic  
521 stability. *Elife.* 3:e02445.



- 522 Cortez MA, Valdecanas D, Niknam S, Peltier HJ, Diao L et al. 2015. In vivo delivery of miR-  
523 34a sensitizes lung tumors to radiation through RAD51 regulation. *Mol Ther-Nucl Acids*.  
524 4:e270.
- 525 Cowan RK, Hoen DR, Schoen DJ, Bureau TE. 2005. MUSTANG is a novel family of  
526 domesticated transposase genes found in diverse angiosperms. *Mol Biol Evol*. 22:2084-  
527 2089.
- 528 Crickard JB, Kaniecki K, Kwon Y, Sung P, Greene EC. 2018. Spontaneous self-segregation of  
529 Rad51 and Dmc1 DNA recombinases within mixed recombinase filaments. *J Biol Chem*.  
530 293:4191-4200.
- 531 de Vries J, Wackernagel W. 2002. Integration of foreign DNA during natural transformation of  
532 *Acinetobacter* sp. by homology-facilitated illegitimate recombination. *Proc Natl Acad Sci*  
533 USA. 99:2094-2099.
- 534 DeBolt S. 2010. Copy number variation shapes genome diversity in *Arabidopsis* over immediate  
535 family generational scales. *Genome Biol Evol*. 2:441-453.
- 536 Dohm JC, Minoche AE, Holtgräwe D, Capella-Gutiérrez S, Zakrzewski F et al. 2014. The  
537 genome of the recently domesticated crop plant sugar beet (*Beta vulgaris*). *Nature*.  
538 505:546-549.
- 539 English AC, Richards S, Han Y, Wang M, Vee V et al. 2012. Mind the gap: upgrading genomes  
540 with Pacific Biosciences RS long-read sequencing technology. *PLOS One*. 7:e47768.
- 541 Ersfeld K. 1994. Fiber-FISH: fluorescence in situ hybridization on stretched DNA. *In Parasite*  
542 *Genomics Protocols.*: Springer.
- 543 Finnegan J, McElroy D. 1994. Transgene inactivation: plants fight back! *Nature Biotech*. 12:883.

- 544 Gaines TA, Zhang W, Wang D, Bukun B, Chisholm ST et al. 2010. Gene amplification confers  
545 glyphosate resistance in *Amaranthus palmeri*. Proc Natl Acad Sci USA. 107:1029-1034.
- 546 Gaines TA, Barker AL, Patterson EL, Westra P, Westra EP et al. 2016. *EPSPS* gene copy  
547 number and whole-plant glyphosate resistance level in *Kochia scoparia*. PLOS ONE.  
548 11:e0168295.
- 549 Gasparini P, Lovat F, Fassan M, Casadei L, Cascione L et al. 2014. Protective role of miR-155 in  
550 breast cancer through RAD51 targeting impairs homologous recombination after  
551 irradiation. Proc Natl Acad Sci USA. 111:4536-4541.
- 552 Godar AS, Stahlman PW, Jugulam M, Dille JA. 2015. Glyphosate-resistant kochia (*Kochia*  
553 *scoparia*) in Kansas: EPSPS gene copy number in relation to resistance levels. Weed Sci.  
554 63:587-595.
- 555 Hackl T, Hedrich R, Schultz J, Förster F. 2014. proovread: large-scale high-accuracy PacBio  
556 correction through iterative short read consensus. Bioinformatics. 30:3004-3011.
- 557 Hastings PJ, Lupski JR, Rosenberg SM, Ira G. 2009. Mechanisms of change in gene copy  
558 number. Nat Rev Genet. 10:551.
- 559 Hudson ME, Lisch DR, Quail PH. 2003. The FHY3 and FAR1 genes encode transposase-related  
560 proteins involved in regulation of gene expression by the phytochrome A-signaling  
561 pathway. Plant J. 34:453-471.
- 562 Hull RM, Cruz C, Jack CV, Houseley J. 2017. Environmental change drives accelerated  
563 adaptation through stimulated copy number variation. PLOS Biol. 15:e2001333.
- 564 Jones P, Binns D, Chang H-Y, Fraser M, Li W et al. 2014. InterProScan 5: genome-scale protein  
565 function classification. Bioinformatics. 30:1236-1240.

- 566 Jugulam M, Niehues K, Godar AS, Koo D-H, Danilova T et al. 2014. Tandem amplification of a  
567 chromosomal segment harboring EPSPS locus confers glyphosate resistance in *Kochia*  
568 *scoparia*. *Plant Physiol.* 166:1200-1207.
- 569 Jugulam M, Gill BS. 2018. Molecular cytogenetics to characterize mechanisms of gene  
570 duplication in pesticide resistance. *Pest Manag Sci.* 74:22-29.
- 571 Koo D-H, Molin WT, Saski CA, Jiang J, Putta K et al. 2018. Extrachromosomal circular DNA-  
572 based amplification and transmission of herbicide resistance in crop weed *Amaranthus*  
573 *palmeri*. *Proc Natl Acad Sci USA.* 115:3332-3337.
- 574 Koren S, Walenz BP, Berlin K, Miller JR, Bergman NH et al. 2017. Canu: scalable and accurate  
575 long-read assembly via adaptive k-mer weighting and repeat separation. *Genome Res.*  
576 27:722-736.
- 577 Kumar V, Jha P, Giacomini D, Westra EP, Westra P. 2015. Molecular basis of evolved  
578 resistance to glyphosate and acetolactate synthase-inhibitor herbicides in kochia (*Kochia*  
579 *scoparia*) accessions from Montana. *Weed Sci.* 63:758-769.
- 580 Li H, Durbin R. 2009. Fast and accurate short read alignment with Burrows–Wheeler transform.  
581 *Bioinformatics.* 25:1754-1760.
- 582 Liao Y, Smyth GK, Shi W. 2013. featureCounts: an efficient general purpose program for  
583 assigning sequence reads to genomic features. *Bioinformatics.* 30:923-930.
- 584 Lin Z, Kong H, Nei M, Ma H. 2006. Origins and evolution of the recA/RAD51 gene family:  
585 evidence for ancient gene duplication and endosymbiotic gene transfer. *Proc Natl Acad*  
586 *Sci USA.* 103:10328-10333.
- 587 Liu G, Xue F, Zhang W. 2015a. miR-506: a regulator of chemo-sensitivity through suppression  
588 of the RAD51-homologous recombination axis. *Chin J Cancer.* 34:44.

- 589 Liu G, Yang D, Rupaimoole R, Pecot CV, Sun Y et al. 2015b. Augmentation of response to  
590 chemotherapy by microRNA-506 through regulation of RAD51 in serous ovarian  
591 cancers. *JNCI-J Natl Cancer I.* 107:djv108.
- 592 Luo M, Wing RA. 2003. An improved method for plant BAC library construction. *In Plant*  
593 *functional genomics.*: Springer.
- 594 Lynch M, Conery JS. 2000. The evolutionary fate and consequences of duplicate genes. *Science.*  
595 290:1151-1155.
- 596 Maacke H, Opitz S, Jost K, Hamdorf W, Henning W et al. 2000. Over-expression of wild-type  
597 Rad51 correlates with histological grading of invasive ductal breast cancer. *Int J Cancer.*  
598 88:907-913.
- 599 Martin SL, Benedict L, Sauder CA, Wei W, da Costa LO et al. 2017. Glyphosate resistance  
600 reduces kochia fitness: Comparison of segregating resistant and susceptible F2  
601 populations. *Plant Sci.* 261:69-79.
- 602 Mayela Soto-Jimenez L, Estrada K, Sanchez-Flores A. 2014. GARM: genome assembly,  
603 reconciliation and merging pipeline. *Curr Top Med Chem.* 14:418-424.
- 604 Mi H, Lazareva-Ulitsky B, Loo R, Kejariwal A, Vandergriff J et al. 2005. The PANTHER  
605 database of protein families, subfamilies, functions and pathways. *Nuc Acids Res.*  
606 33:D284-D288.
- 607 Molin WT, Wright AA, Lawton-Rauh A, Saski CA. 2017. The unique genomic landscape  
608 surrounding the *EPSPS* gene in glyphosate resistant *Amaranthus palmeri*: a repetitive  
609 path to resistance. *BMC Gen.* 18:91.

- 610 Nash HA. 1996. Site-specific recombination: integration, excision, resolution, and inversion of  
611 defined DNA segments. In *Escherichia coli and Salmonella: Cellular and Molecular*  
612 *Biology*, edited by Neidhardt, FC: ASM Press.
- 613 Ottaviani D, LeCain M, Sheer D. 2014. The role of microhomology in genomic structural  
614 variation. *Trends Genet.* 30:85-94.
- 615 Patterson EL, Pettinga DJ, Ravet K, Neve P, Gaines TA. 2018. Glyphosate resistance and *EPSPS*  
616 gene duplication: Convergent evolution in multiple plant species. *J Hered.* 109:117-125.
- 617 Petes TD, Hill CW. 1988. Recombination between repeated genes in microorganisms. *Annu Rev*  
618 *Genet.* 22:147-168.
- 619 Pettinga DJ, Ou J, Patterson EL, Jugulam M, Westra P et al. 2018. Increased Chalcone Synthase  
620 (CHS) expression is associated with dicamba resistance in *Kochia scoparia*. *Pest Manag*  
621 *Sci.* 74:2306-2315.
- 622 Preston C, Belles DS, Westra PH, Nissen SJ, Ward SM. 2009. Inheritance of resistance to the  
623 auxinic herbicide dicamba in kochia (*Kochia scoparia*). *Weed Sci.* 57:43-47.
- 624 Reams AB, Neidle EL. 2004. Gene amplification involves site-specific short homology-  
625 independent illegitimate recombination in *Acinetobacter* sp. strain ADP1. *J Mol Biol.*  
626 338:643-656.
- 627 Reams AB, Roth JR. 2015. Mechanisms of gene duplication and amplification. *CSH Perspect*  
628 *Biol.* 7:a016592.
- 629 Robinson MD, McCarthy DJ, Smyth GK. 2010. edgeR: a Bioconductor package for differential  
630 expression analysis of digital gene expression data. *Bioinformatics.* 26:139-140.
- 631 Romero D, Palacios R. 1997. Gene amplification and genomic plasticity in prokaryotes. *Annu*  
632 *Rev Genet.* 31:91-111.

- 633 Sammons DR, Gaines TA. 2014. Glyphosate resistance: State of knowledge. *Pest Manag Sci.*  
634 70:1367-1377.
- 635 Schimke R, Hill A, Johnston R. 1985. Methotrexate resistance and gene amplification: an  
636 experimental model for the generation of cellular. *Br J Cancer.* 51:459-465.
- 637 Schmittgen TD, Livak KJ. 2008. Analyzing real-time PCR data by the comparative  $C_T$  method.  
638 *Nat Protoc.* 3:1101-1108.
- 639 Sfeir A, Symington LS. 2015. Microhomology-mediated end joining: a back-up survival  
640 mechanism or dedicated pathway? *Trends Biochem Sci.* 40:701-714.
- 641 Simão FA, Waterhouse RM, Ioannidis P, Kriventseva EV, Zdobnov EM. 2015. BUSCO:  
642 assessing genome assembly and annotation completeness with single-copy orthologs.  
643 *Bioinformatics.* 31:3210-3212.
- 644 Tang W, Newton RJ, Weidner DA. 2006. Genetic transformation and gene silencing mediated by  
645 multiple copies of a transgene in eastern white pine. *J Exp Bot.* 58:545-554.
- 646 Tang W, Wang W, Chen D, Ji Q, Jing Y et al. 2012. Transposase-derived proteins FHY3/FAR1  
647 interact with PHYTOCHROME-INTERACTING FACTOR1 to regulate chlorophyll  
648 biosynthesis by modulating HEMB1 during deetiolation in *Arabidopsis*. *Plant Cell.*  
649 24:1984-2000.
- 650 Tarailo-Graovac M, Chen N. 2009. Using RepeatMasker to identify repetitive elements in  
651 genomic sequences. *Curr Prot Bioinformatics.* 25:4.10.1-4.10.14.
- 652 Thrasher A, Musgrave Z, Kachmarck B, Thain D, Emrich S. 2014. Scaling up genome  
653 annotation using MAKER and work queue. *Int J Bioinformatics Res Appl.* 10:447-460.

- 654 Tsubota SI, Rosenberg D, Szostak H, Rubin D, Schedl P. 1989. The cloning of the Bar region  
655 and the B breakpoint in *Drosophila melanogaster*: evidence for a transposon-induced  
656 rearrangement. *Genetics*. 122:881-890.
- 657 Vila-Aiub MM, Goh SS, Gaines TA, Han H, Busi R et al. 2014. No fitness cost of glyphosate  
658 resistance endowed by massive *EPSPS* gene amplification in *Amaranthus palmeri*.  
659 *Planta*. 239:793-801.
- 660 Wang H, Deng XW. 2002. Arabidopsis FHY3 defines a key phytochrome A signaling  
661 component directly interacting with its homologous partner FAR1. *EMBO J*. 21:1339-  
662 1349.
- 663 Wiersma AT, Gaines TA, Preston C, Hamilton JP, Giacomini D et al. 2015. Gene amplification  
664 of 5-enol-pyruvylshikimate-3-phosphate synthase in glyphosate-resistant *Kochia*  
665 *scoparia*. *Planta*. 241:463-474.
- 666 Xi R, Hadjipanayis AG, Luquette LJ, Kim T-M, Lee E et al. 2011. Copy number variation  
667 detection in whole-genome sequencing data using the Bayesian information criterion.  
668 *Proc Natl Acad Sci USA*. 108:E1128-E1136.
- 669

## TABLES

Table 1. List of genes near *EPSPS* that are in or flanking the *EPSPS* CNV event. Read depth is the  $\log_2$  of the difference between the background read depth and the read depth of each gene from genomic Illumina sequencing of a glyphosate resistant line. Base-pair coordinates are given relative to their position in the contig from the susceptible genome assembly. DE is the  $\log_2$  differential expression between four resistant and four susceptible individuals from RNA-Seq. P-value is the significance of DE and is adjusted for false discovery rate.

| Gene     | Beginning | Ending  | Length | Orientation | Description                                            | Part of the CNV?  | Read Depth | DE    | P-value |
|----------|-----------|---------|--------|-------------|--------------------------------------------------------|-------------------|------------|-------|---------|
| KS_00451 | 27,406    | 28,674  | 1,268  | Reverse     | GRAVITROPIC IN THE LIGHT 1-like                        | No                | 0          | -0.43 | 0.00    |
| KS_00452 | 35,728    | 36,696  | 968    | Reverse     | IRK-Interacting Protein                                | No                | 0          | -2.62 | 0.05    |
| KS_00453 | 37,839    | 41,640  | 3,801  | Reverse     | Nitroreductase family                                  | No                | 0          | 0.74  | 0.00    |
| KS_00454 | 43,124    | 47,121  | 3,997  | Forward     | arginase 1, mitochondrial                              | 56.1 kb           | 2.86       | 2.23  | 0.00    |
| KS_00455 | 47,240    | 52,651  | 5,411  | Reverse     | protein NRT1/ PTR FAMILY 7.2-like                      | 56.1 kb           | 2.86       | 0.72  | 0.58    |
| KS_00456 | 63,014    | 72,467  | 9,453  | Forward     | tRNA N6-adenosine threonylcarbamoyltransferase         | 56.1 kb & 32.7 kb | 3.49       | 3.03  | 0.00    |
| KS_00457 | 72,617    | 73,531  | 914    | Reverse     | golgin subfamily A member 6-like                       | 56.1 kb & 32.7 kb | 3.49       | -3.18 | 0.00    |
| KS_00458 | 76,342    | 81,181  | 4,839  | Forward     | DNA repair protein RAD51                               | 56.1 kb & 32.7 kb | 3.46       | 1.33  | 0.00    |
| KS_00459 | 82,421    | 84,836  | 2,415  | Forward     | transketolase, chloroplastic-like                      | 56.1 kb & 32.7 kb | 3.29       | 3.83  | 0.00    |
| KS_00460 | 91,663    | 97,214  | 5,551  | Forward     | 3-phosphoshikimate 1-carboxyvinyltransferase 2 (EPSPS) | 56.1 kb & 32.7 kb | 3.12       | 4.01  | 0.00    |
| KS_00461 | 106,901   | 109,241 | 2,340  | Forward     | NAD dependent epimerase                                | No                | 0          | 2.52  | 0.00    |
| KS_00462 | 106,975   | 110,332 | 3,357  | Reverse     | uncharacterized protein                                | No                | 0          | 2.54  | 0.06    |
| KS_00463 | 113,504   | 114,006 | 502    | Reverse     | DUF861                                                 | No                | 0          | 0.05  | 0.85    |



Table 2. Primers for qPCR markers for determining copy number at multiple locations near the *EPSPS* gene and qPCR markers for determining copy number of 56.1 kb repeats, 32.7 kb repeats, and the MGE. Base-pair coordinates of PCR amplicons are given relative to their position in the contig from the susceptible genome assembly

| Primer name    | Primer sequence                 | Melting Temp (°C) | GC Content (%) | Base-Pair Start/Stop |
|----------------|---------------------------------|-------------------|----------------|----------------------|
| 1              | 5'-CATAGGTTGAGGGTGGACTTTC-3'    | 55.2              | 50             | 28,602               |
| 1              | 5'-GGTGTGTTGTTTGACCACCTTTC-3'   | 54.8              | 45.5           | 28,712               |
| 2              | 5'-TTCTGCCTCAGCAAACATACT-3'     | 54.3              | 42.9           | 39,028               |
| 2              | 5'-CATGGTCACTTTGTGTGTCATTAG-3'  | 54.2              | 41.7           | 39,127               |
| 3              | 5'-CTCGGAAAGGATGGAAGAATG-3'     | 53.2              | 47.6           | 43,248               |
| 3              | 5'-GTTATGTCCTGTCTTCTGTGTG-3'    | 53.2              | 45.5           | 43,408               |
| 4              | 5'-TTTCGCTTTCCGAGGTAATAG-3'     | 52.4              | 42.9           | 50,680               |
| 4              | 5'-CAACTAACACGAACATTGTGTC-3'    | 52.2              | 40.9           | 50,833               |
| 5              | 5'-TCGAAGCCTGACATTAGATTAG-3'    | 51.9              | 40.9           | 68,546               |
| 5              | 5'-CTCTTTGTACCTGATCCCATC-3'     | 52.5              | 47.6           | 68,700               |
| 6              | 5'-CTCCTCCTCCCTCCTAATATC-3'     | 53                | 52.4           | 73,024               |
| 6              | 5'-CTTGTTTCCTCCTCTCGTTC-3'      | 52.9              | 50             | 73,154               |
| 7              | 5'-TCATCCCTTCTCTCTCCTC-3'       | 52.9              | 50             | 82,513               |
| 7              | 5'-GATAAGTCCGTC AACACGATC-3'    | 53.1              | 47.6           | 82,687               |
| 8              | 5'-GACATCCTGTCATGGAGTAAG-3'     | 52.4              | 47.6           | 94,023               |
| 8              | 5'-CCTAAATAAACCGGAAGCAATC-3'    | 51.8              | 40.9           | 94,172               |
| 9              | 5'-TCAACACCCAACCTCACATCTC-3'    | 54.7              | 47.6           | 106,488              |
| 9              | 5'-TAGAAGCACAGGAGAGAGAGAA-3'    | 54.5              | 45.5           | 106,610              |
| 10             | 5'-GGCATGTGGAGAAGATGTATAG-3'    | 52.7              | 45.5           | 114,766              |
| 10             | 5'-CTTTGTTGGTTCAATTGGAGG-3'     | 52.2              | 42.9           | 114,942              |
| 11             | 5'-TCGGATCCCTTAGATACTACTAC-3'   | 52.8              | 45.5           | 126,791              |
| 11             | 5'-GTTACCTGTCTTGAGCAGTG-3'      | 53.1              | 50             | 126,950              |
| Repeat Type-FP | 5'-GACGGAAATACCCTCAATATAGACA-3' | 54.0              | 40.0           | N/A                  |
| 56.1kb RP      | 5'-ACGCCCAAGATGTACATTGATA-3'    | 54.0              | 40.9           | N/A                  |
| 32.7kb RP      | 5'-CATGCCTTTGATGTCCAAGTTT-3'    | 54.1              | 40.9           | N/A                  |
| Fhy3/FAR1 FP   | 5'-GAAGATAGCGAGACGTTTGAG-3'     | 53.0              | 47.6           | N/A                  |
| Fhy3/FAR1 RP   | 5'-CGGCTTGATCGGTTAAGATAC-3'     | 53.2              | 47.6           | N/A                  |

Table 3. Copy number data from all qPCR markers on three glyphosate-susceptible (7710) and five glyphosate-resistant (M32) individuals. Copy number is calculated as  $\Delta C_t = (C_t^{(ALS)} + C_t^{(CPS)})/2 - C_t^{Marker}$ . “N/A” stands for “No Amplification”.

| Line | Biological |     |     |      |      |      |      |      |      |     |     |     |
|------|------------|-----|-----|------|------|------|------|------|------|-----|-----|-----|
|      | Replicate  | 1   | 2   | 3    | 4    | 5    | 6    | 7    | 8    | 9   | 10  | 11  |
| 7710 | 1          | 0.9 | 0.7 | N/A  | 1.1  | 1.6  | 1.1  | 1.3  | 1.2  | 0.7 | 1.9 | 0.8 |
|      | 2          | 0.7 | 0.7 | N/A  | 1.0  | 1.5  | 1.2  | 1.4  | 1.4  | 0.9 | 1.7 | 1.2 |
|      | 3          | 0.7 | 0.6 | N/A  | 0.9  | 1.0  | 1.2  | 0.7  | 1.3  | 1.0 | 1.6 | 1.1 |
| M32  | 1          | 0.9 | 0.7 | 9.5  | 6.1  | 11.3 | 11.2 | 11.3 | 11.5 | 1.0 | N/A | 1.0 |
|      | 2          | 0.8 | 0.7 | 9.5  | 6.0  | 12.6 | 12.1 | 12.4 | 13.3 | 1.0 | N/A | 1.1 |
|      | 3          | 0.7 | 0.6 | 7.6  | 3.2  | 10.9 | 11.1 | 11.0 | 11.7 | 1.0 | N/A | 1.0 |
|      | 4          | 0.7 | 0.7 | 8.1  | 5.1  | 10.8 | 9.9  | 10.4 | 9.9  | 0.9 | N/A | 0.9 |
|      | 5          | 1.2 | 1.0 | 14.2 | 10.0 | 20.3 | 19.0 | 19.6 | 20.0 | 1.3 | N/A | 1.4 |

Table 4. Copy number data for the number of 56.1 kb repeats, 32.7 kb repeats, and the MGE on three glyphosate-susceptible (7710) and five glyphosate-resistant (M32) individuals. Copy number is calculated as  $\Delta C_t = (C_t^{(ALS)} + C_t^{(CPS)})/2 - C_t^{Marker}$ . “N/A” stands for “No Amplification”.

| Line | Replicate | 56.1kb | 32.7kb | MGE  |
|------|-----------|--------|--------|------|
| 7710 | 1         | N/A    | N/A    | 3.9  |
|      | 2         | N/A    | N/A    | 5.5  |
|      | 3         | N/A    | N/A    | 4.7  |
| M32  | 1         | 5.4    | 1.8    | 16.2 |
|      | 2         | 5.1    | 1.9    | 17.4 |
|      | 3         | 5.1    | 1.7    | 18.2 |
|      | 4         | 5.3    | 1.7    | 14.1 |
|      | 5         | 6.9    | 2.1    | 17.7 |

## FIGURE LEGENDS

Figure 1. A comparison of the *EPSPS* contig from kochia (Green), an genomic scaffold from chromosome 1 of the *Beta vulgaris* genome (Red) (Genbank ID: KQ090199.1) (Dohm et al. 2014), and the *EPSPS* replicon from *Amaranthus palmeri* (Orange) (Molin et al. 2017). Blue and yellow blocks indicate genes in the forward and reverse orientation, respectively. The *EPSPS* gene is highlighted in orange. Red, connecting lines, indicate areas of high similarity between *Beta vulgaris* and kochia. Orange, connecting lines indicate areas of high similarity between *Amaranthus palmeri* and kochia. Number of base pairs in the alignment are listed on the outside track. The links between *Beta vulgaris* and kochia that fall within the *EPSPS* duplicated region are highlighted in orange.

Figure 2. A diagram of the four assembled BACs and how they overlap to generate five different repeat types of the *EPSPS* CNV locus from glyphosate resistant kochia. The mobile genetic element (MGE) is illustrated as a blue rectangle, the *EPSPS* gene is a green arrow, the co-duplicated genes are orange arrows, and the beginning and end of the inverted repeat are vertical arrow lines.

Figure 3. A dot-plot alignment of the assembled resistant *EPSPS* locus to the contig containing *EPSPS* from the susceptible genome assembly. The location of *EPSPS* is indicated by a red box. Large gaps in alignment are the insertion sites of the MGE.

Figure 4. A) Illumina shotgun genome resequencing data from a resistant kochia plant aligned to four distinct units from the BAC assembly: 1) The region directly upstream of the *EPSPS* tandem duplication, 2) the tandemly duplicated region of the genome containing *EPSPS*, 3) the MGE, and 4) the region directly downstream of the *EPSPS* tandem duplication. Red lines indicate the average read depth for that unit. Two averages are indicated for the tandemly duplicated region of the genome containing *EPSPS* due to two major repeat sites existing in the *EPSPS* CNV structure: the 56.1 kb and 32.7 kb repeat types. B) A table outlining the calculation for copy number estimates for the four units. The total length of the region, the amount of repetitive DNA that was masked, the amount of DNA remaining unmasking, the number of reads mapped to the unmasked regions, the average reads per kilobase of unmasked DNA, and the read depth divided by the reads/kb unmasked of the non-duplicated region.

Figure 5. A model for the generation and continued increase of *EPSPS* copy number. The initial event that led to *EPSPS* gene duplication was the insertion of two mobile elements both upstream and downstream of the *EPSPS* gene (MGE). After unequal crossing over, gametes were produced with  $>1$  *EPSPS* gene copy. Subsequently, a double stranded break occurred at the MGE boundary that was incorrectly repaired using a microhomology-mediated mechanism within the middle of the repeat region, generating a shorter copy of this repeat region (32.7kb repeat).

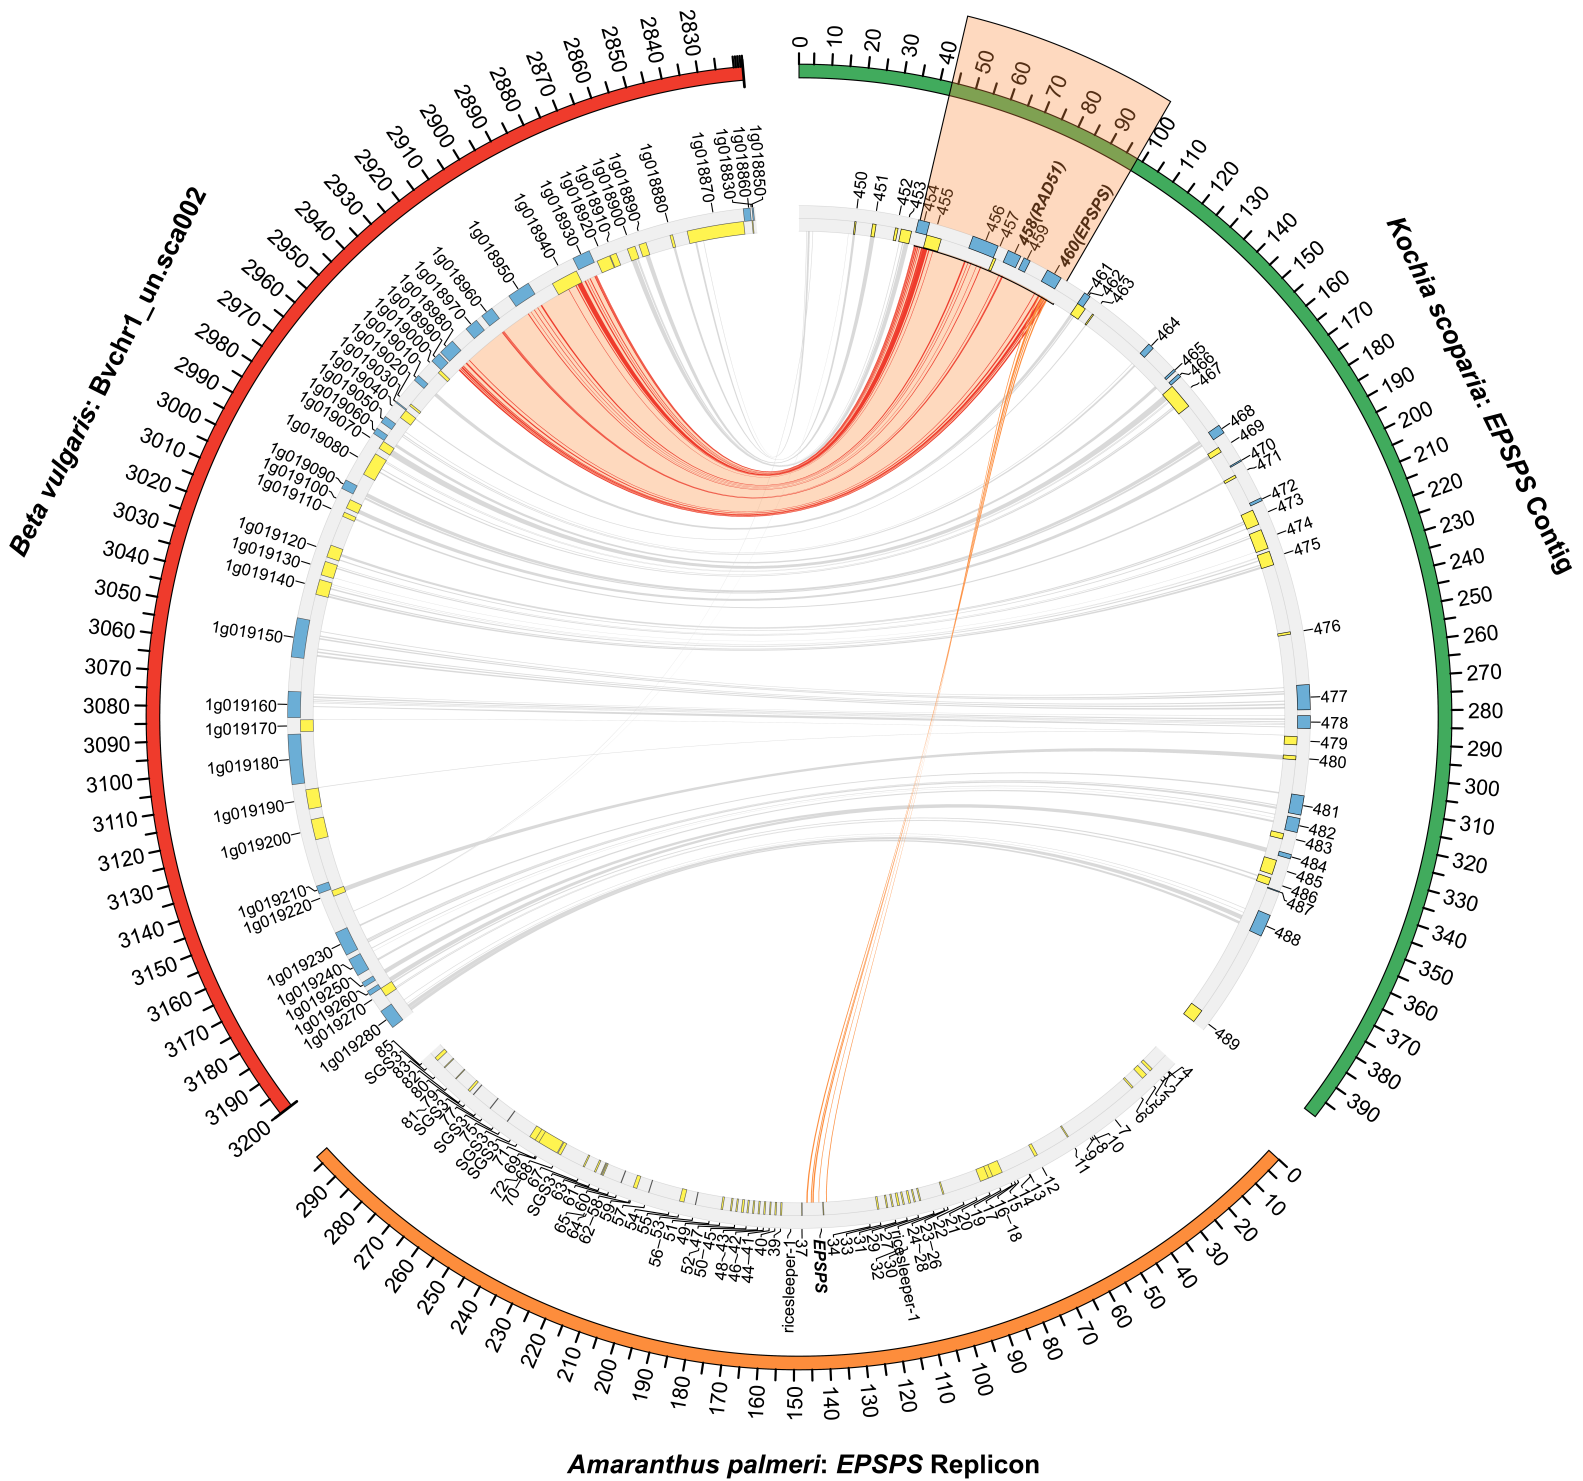

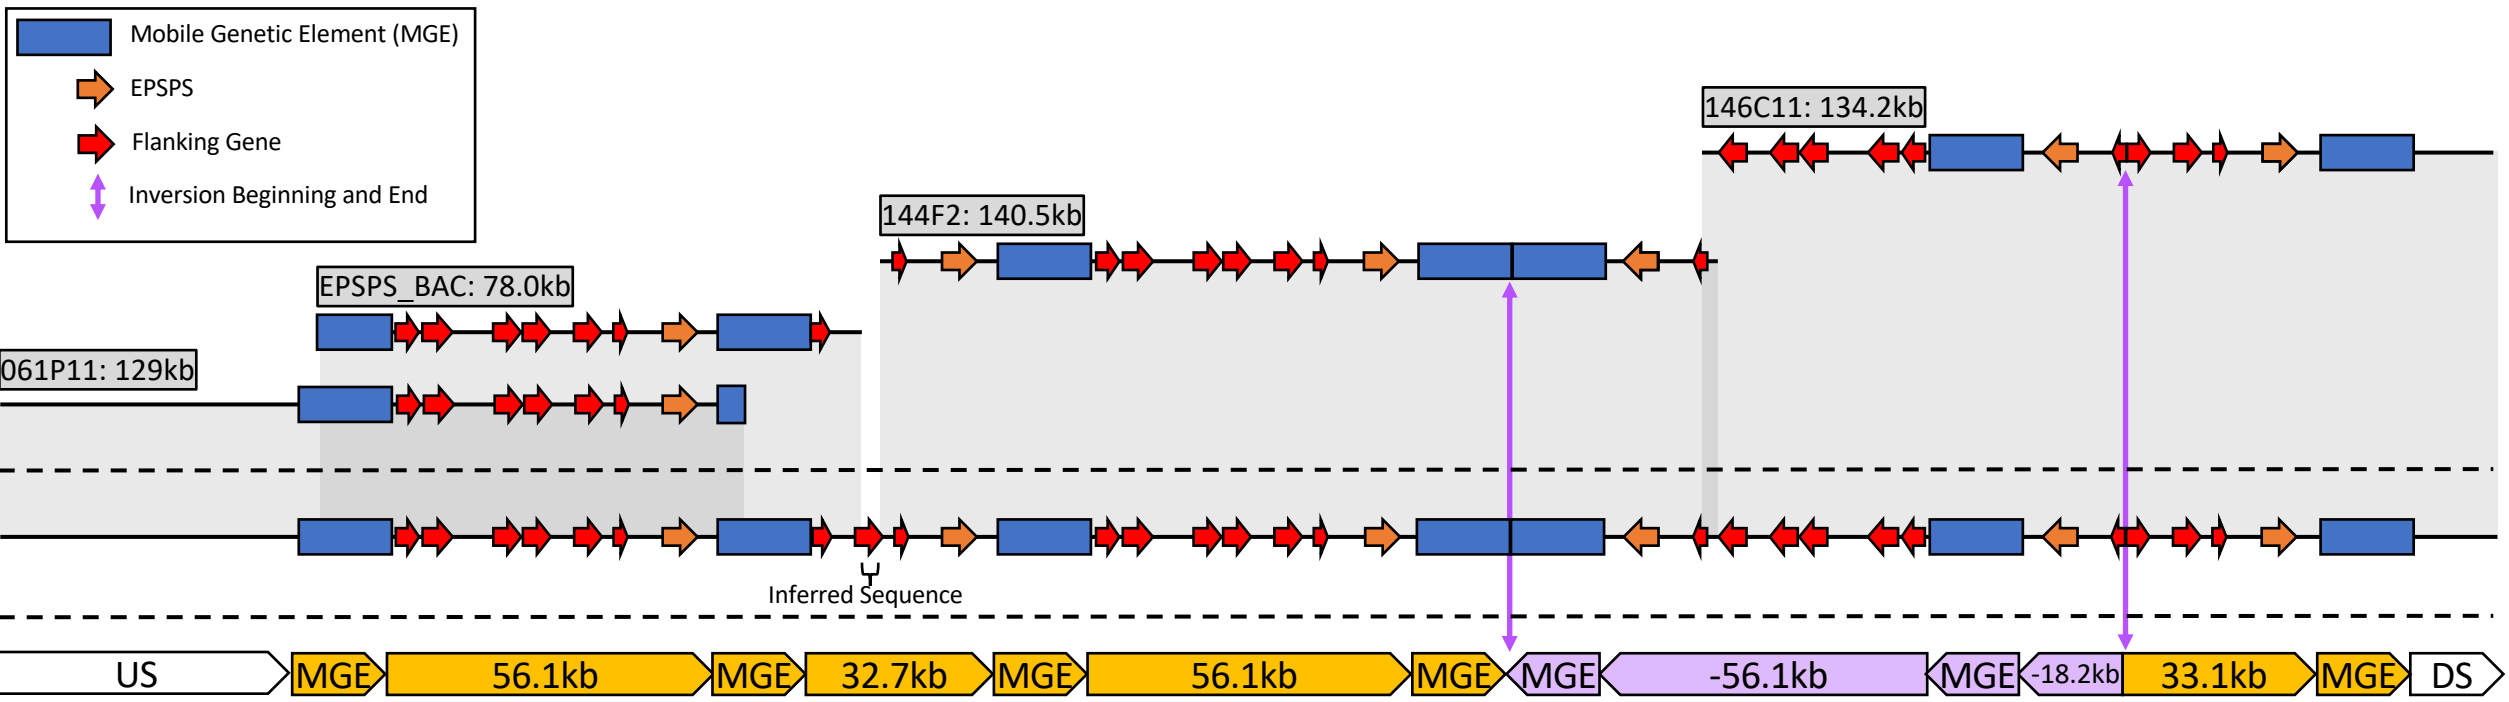

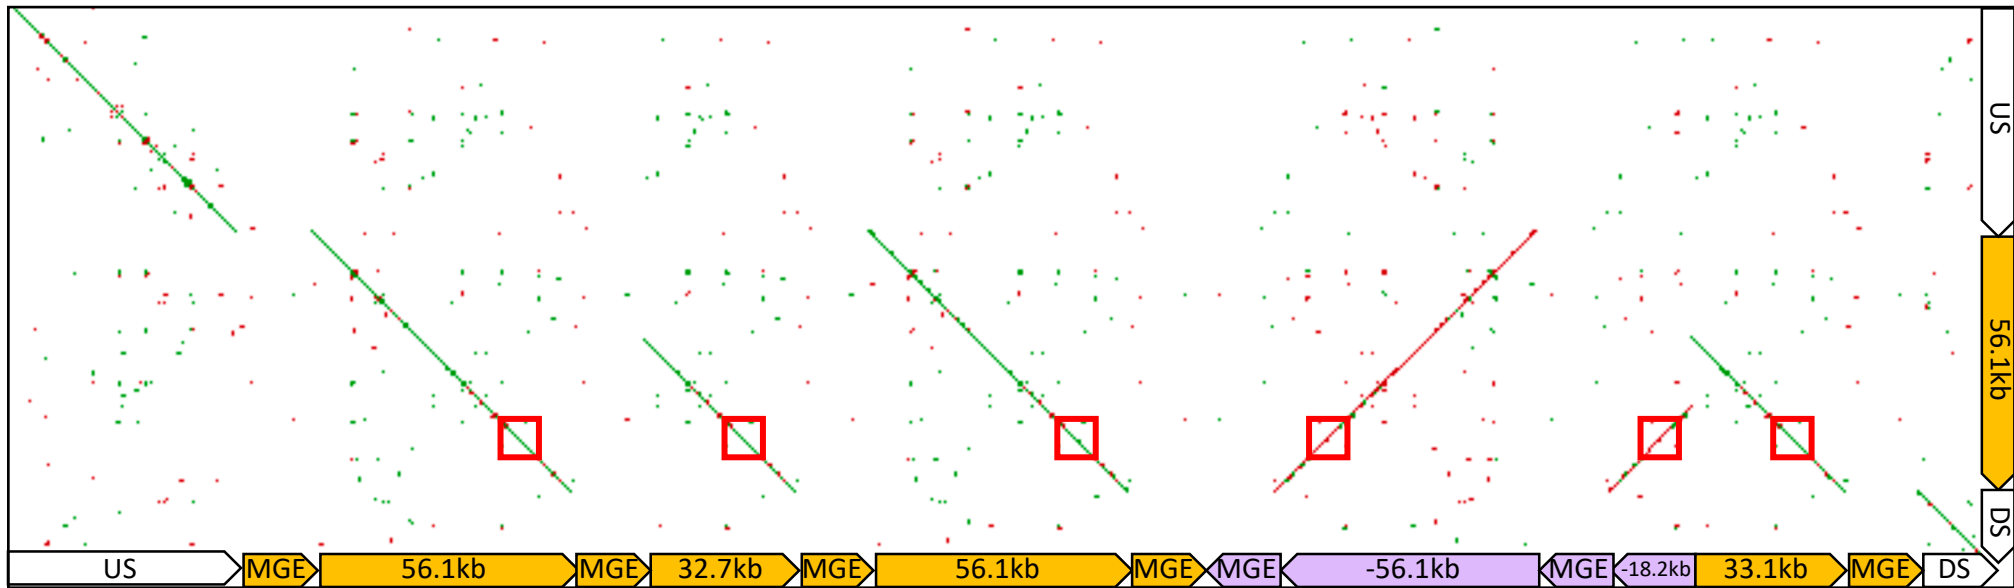

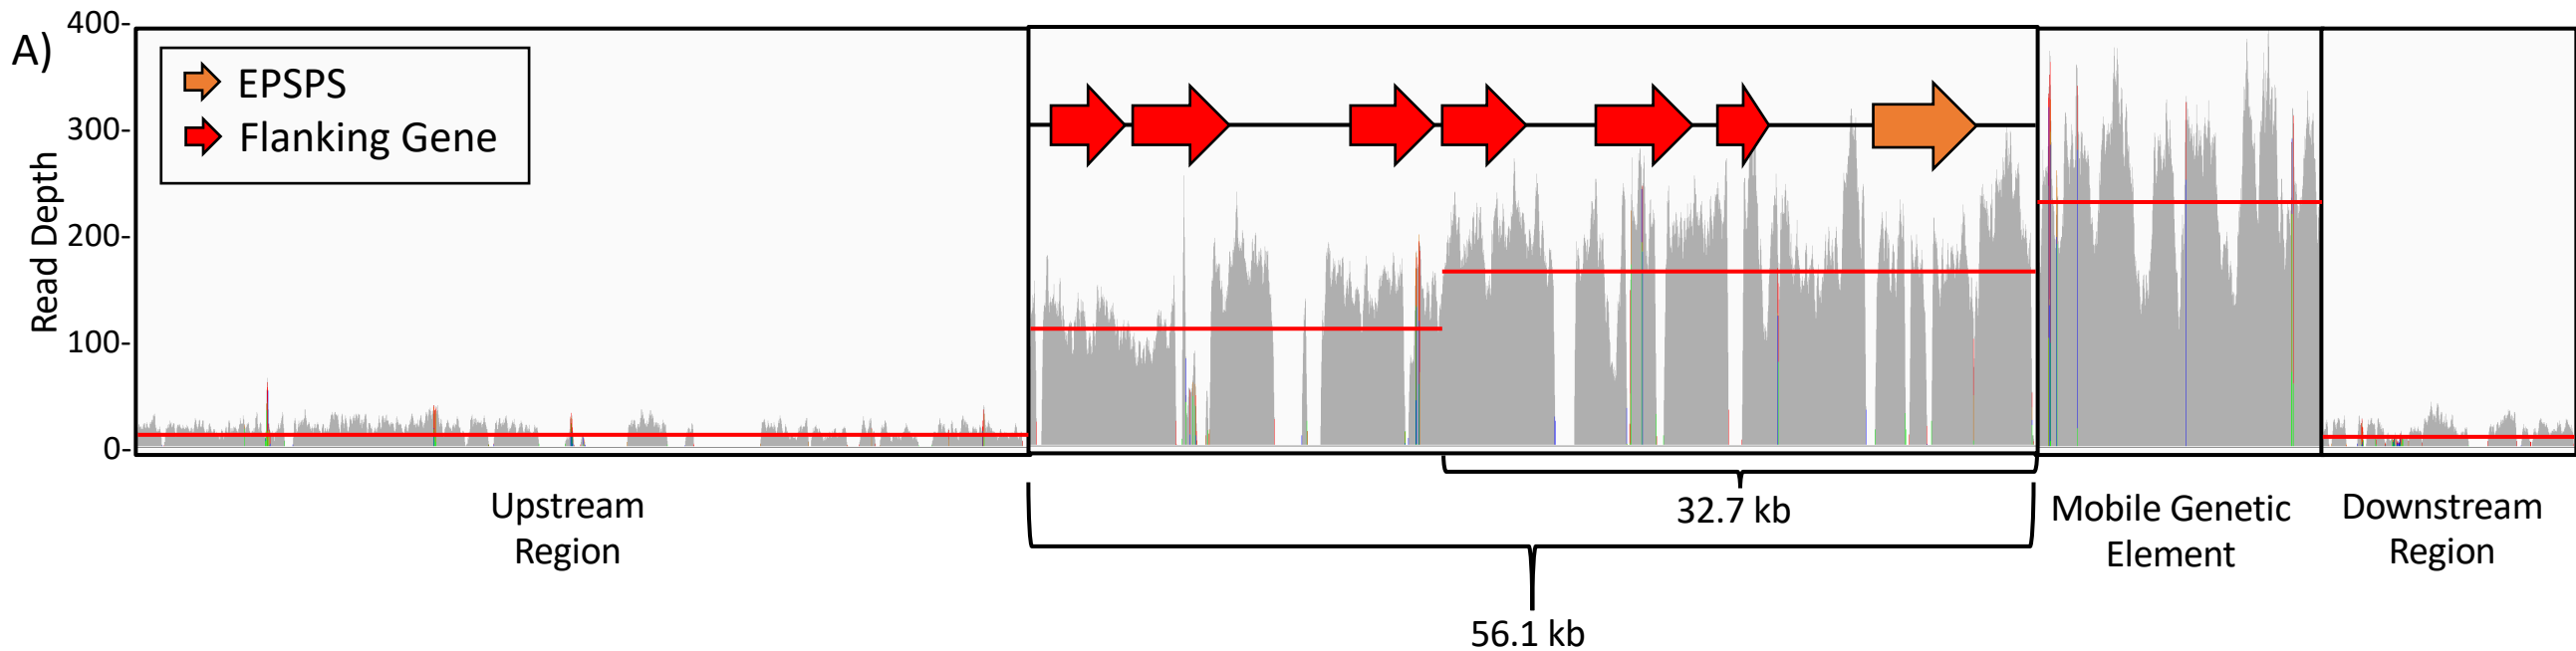

B)

|                | Total Length (bp) | Amount Masked (bp) | Amount Unmasked (bp) | Reads Mapped | Reads/kb Unmasked | Standardized Read Depth |
|----------------|-------------------|--------------------|----------------------|--------------|-------------------|-------------------------|
| Upstream       | 49,604            | 11,462             | 38,142               | 5,753        | 150.8             | 1.0                     |
| Downstream     | 14,467            | 2,294              | 12,173               | 1,783        | 146.5             | 1.0                     |
| Type I only    | 23,351            | 3,655              | 19,696               | 21,555       | 1,094.4           | 7.4                     |
| Type I and II  | 32,892            | 3,406              | 29,486               | 47,598       | 1,614.3           | 10.9                    |
| Mobile Element | 16,025            | 152                | 15,873               | 33,767       | 2,127.3           | 14.3                    |



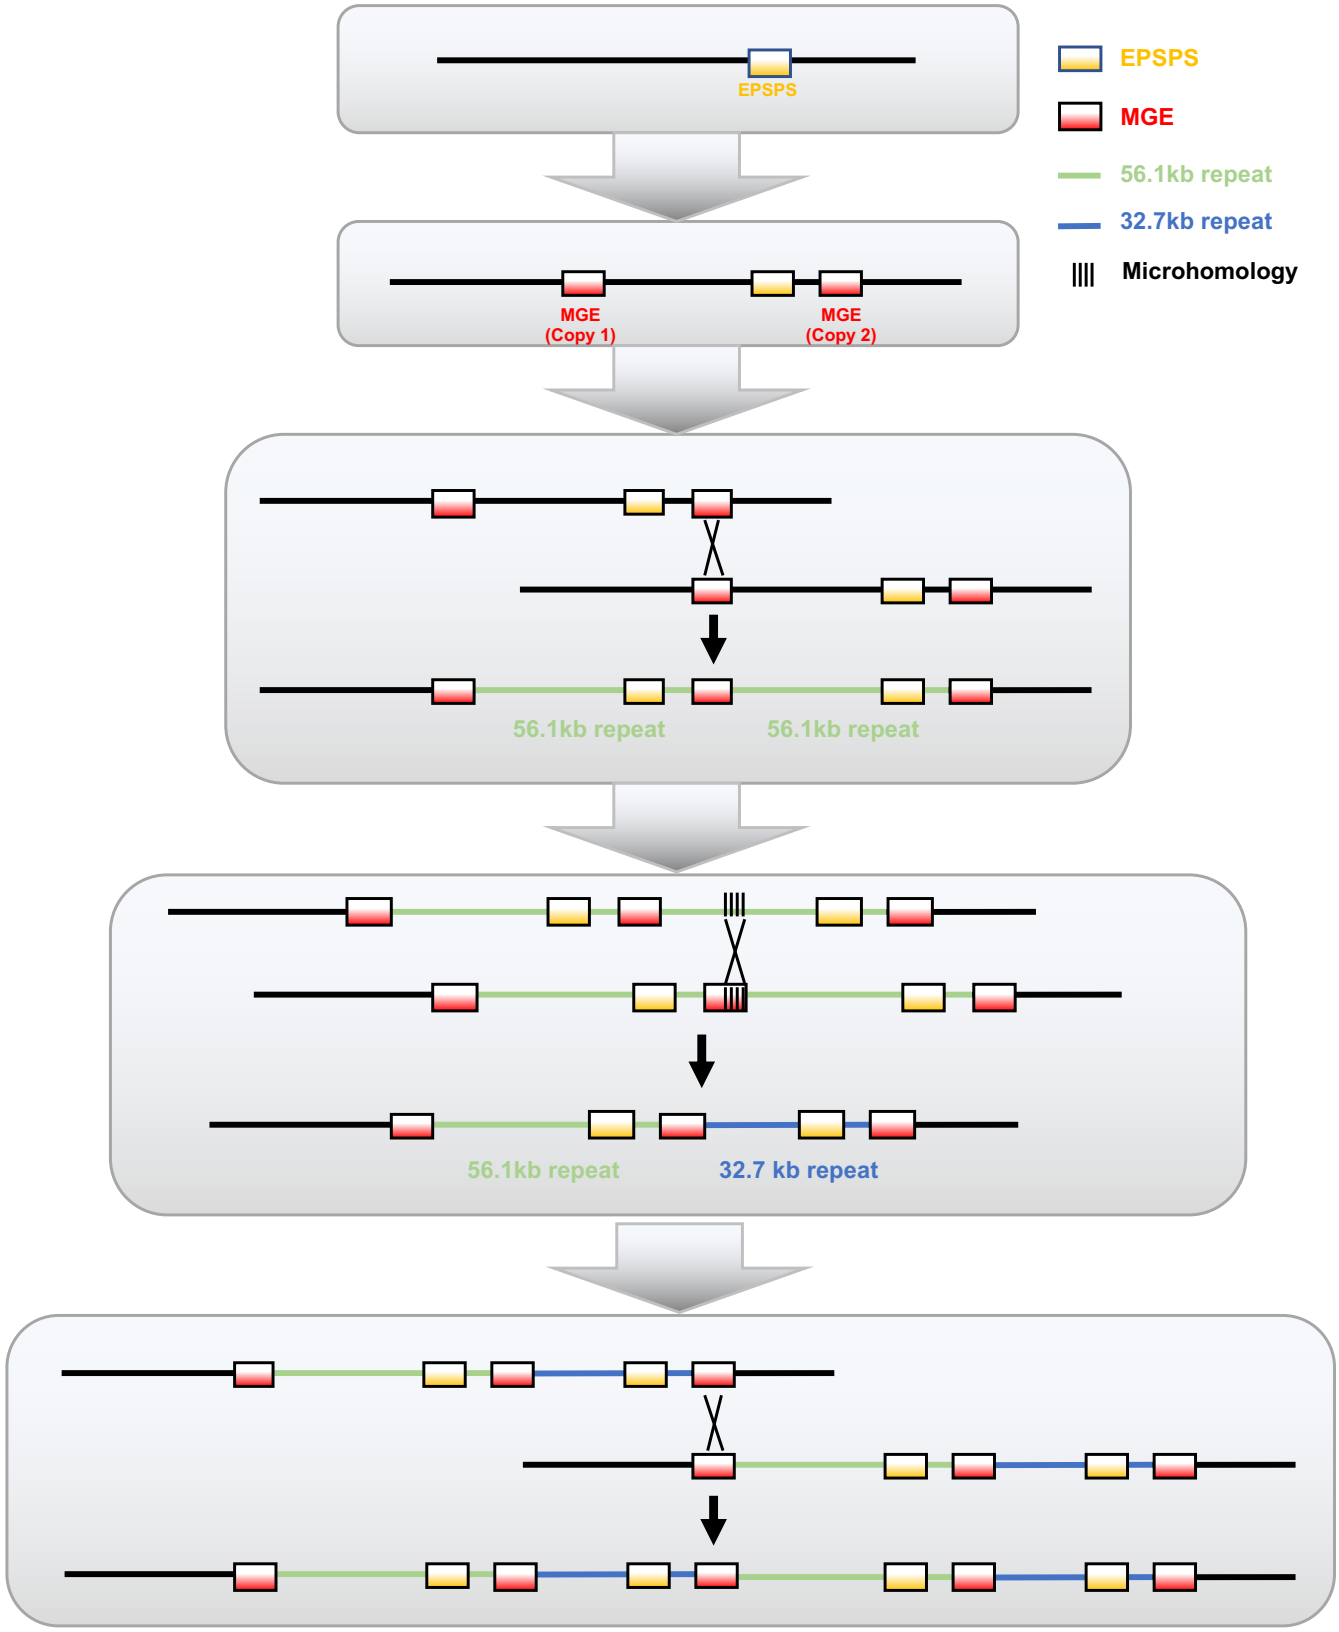

Source: http://biorxiv.org/content/10.1101/600072v1.full.pdf
